# Supplementary material for: Multiple-Vessel-Based Blood Gas Profiles Analysis Revealed the Potential of Blood Oxygen in Mammary Vein as Indicator of Mammary Gland Health Risk of High-Yielding Dairy Cows
Source: MDPI journal article supplement (doi:10.3390/ani12121484), 2022-06-08
Supplement: s1 [file s1]

**Table S1.** Power Analysis.

| <b>Index</b> | <b>Group</b> | <b>Power</b> |
|--------------|--------------|--------------|
| 1            | 3            | 0.187162     |
| 2            | 4            | 0.268148     |
| 3            | 5            | 0.346111     |
| 4            | 6            | 0.419781     |
| 5            | 7            | 0.488381     |
| 6            | 8            | 0.551465     |
| 7            | 9            | 0.608846     |
| 8            | 10           | 0.660547     |
| 9            | 11           | 0.706738     |
| 10           | 12           | 0.747699     |
| 11           | 13           | 0.78378      |
| 12           | 14           | 0.81537      |
| 13           | 17           | 0.887267     |
| 14           | 19           | 0.920022     |
| 15           | 21           | 0.943828     |
| 16           | 23           | 0.960905     |
| 17           | 25           | 0.973012     |
| 18           | 27           | 0.981509     |
| 19           | 35           | 0.996177     |
| 20           | 40           | 0.998632     |
| 21           | 45           | 0.999524     |
| 22           | 50           | 0.999838     |
| 23           | 55           | 0.999946     |
| 24           | 60           | 0.999982     |
| 25           | 65           | 0.999994     |
| 26           | 70           | 0.999998     |

**Table S2.** Basal diet of high-yielding dairy cows.

| Item                                         | Amount |
|----------------------------------------------|--------|
| Ingredients, %, DM basis                     |        |
| Corn                                         | 13.0   |
| Flaked corn                                  | 13.6   |
| Soybean meal                                 | 14.4   |
| Molasses                                     | 1.31   |
| Beet pulp                                    | 6.79   |
| Silage corn                                  | 22.8   |
| Alfalfa hay                                  | 15.5   |
| Oat hay                                      | 4.62   |
| Brewers grain                                | 4.01   |
| Premix <sup>1</sup>                          | 0.55   |
| Premix <sup>2</sup>                          | 3.50   |
| Chemical composition (% DM)                  |        |
| Crude protein                                | 15.0   |
| Neutral detergent fiber                      | 37.4   |
| Acid detergent fiber                         | 23.5   |
| Crude ash                                    | 7.26   |
| NE <sub>L</sub> (Mcal/kg of DM) <sup>3</sup> | 1.78   |

<sup>1</sup>Formulated to provide (per kilogram of DM on average): 150 g of Salt, 310,000 IU of vitamin A, 52,500 IU of vitamin D<sub>3</sub>, 2250 IU of vitamin E, 2400 mg of Zn, 16.5 mg of Se, 56.3 mg of I, 600 mg of Fe, 26.3 mg of Co, 1900 mg of Mn and 450 mg of Cu, 50 g of water.

<sup>2</sup>Formulated to provide (per kilogram of DM on average): 0.82% of sodium bicarbonate, 0.41% of calcium hydrogen phosphate, 0.59% of calcium carbonate, 1.23% of calcium salt of palm fatty acid distillate, 0.41% of salt, 0.07% of mold adsorbent, 0.07% of active yeast.

**Table S3.** Distribution of blood gas profiles in high-yielding dairy cows.

| Item <sup>1</sup>              | Mammary vein (n=20) |      |       |       |       |      | Jugular artery (n=20) |      |       |       |       |      | Jugular vein (n=20) |      |       |       |       |      |
|--------------------------------|---------------------|------|-------|-------|-------|------|-----------------------|------|-------|-------|-------|------|---------------------|------|-------|-------|-------|------|
|                                | Max                 | Min  | Mean  | SD    | SEM   | CV   | Max                   | Min  | Mean  | SD    | SEM   | CV   | Max                 | Min  | Mean  | SD    | SEM   | CV   |
| Na <sup>+</sup> , mmol/L       | 139                 | 132  | 137.1 | 1.76  | 0.4   | 1.3  | 139                   | 133  | 136.6 | 1.67  | 0.38  | 1.2  | 138                 | 134  | 136.2 | 1.36  | 0.31  | 1    |
| K <sup>+</sup> , mmol/L        | 4.2                 | 3.2  | 3.7   | 0.22  | 0.05  | 5.9  | 4.3                   | 3.4  | 3.8   | 0.21  | 0.05  | 5.5  | 4.6                 | 3.7  | 4.1   | 0.23  | 0.05  | 5.6  |
| TCO <sub>2</sub> , mmol/L      | 39                  | 30   | 32.9  | 1.98  | 0.45  | 6    | 35                    | 28   | 30.9  | 1.76  | 0.4   | 5.7  | 34                  | 29   | 31.5  | 1.5   | 0.34  | 4.8  |
| iCa <sup>2+</sup> , mmol/L     | 1.23                | 1.04 | 1.14  | 0.048 | 0.011 | 4.2  | 1.32                  | 1.07 | 1.19  | 0.065 | 0.015 | 5.5  | 1.31                | 1.13 | 1.22  | 0.048 | 0.011 | 3.9  |
| HCT                            | 0.28                | 0.21 | 0.24  | 0.017 | 0.004 | 7.1  | 0.29                  | 0.22 | 0.24  | 0.019 | 0.004 | 7.9  | 0.31                | 0.21 | 0.24  | 0.021 | 0.005 | 8.8  |
| HGB, g/dl                      | 9.5                 | 7.1  | 8.1   | 0.58  | 0.13  | 7.2  | 9.9                   | 7.5  | 8.2   | 0.6   | 0.14  | 7.3  | 10.5                | 7.1  | 8.2   | 0.73  | 0.17  | 8.9  |
| pH                             | 7.64                | 7.46 | 7.5   | 0.044 | 0.01  | 0.6  | 7.56                  | 7.38 | 7.5   | 0.05  | 0.011 | 0.7  | 7.67                | 7.38 | 7.44  | 0.059 | 0.014 | 0.8  |
| pCO <sub>2</sub> , mmHg        | 45.6                | 37.7 | 40.9  | 2.12  | 0.49  | 5.2  | 43.9                  | 32.4 | 36.8  | 2.93  | 0.67  | 8    | 49.6                | 39.6 | 45    | 2.22  | 0.51  | 4.9  |
| pO <sub>2</sub> , mmHg         | 49                  | 29   | 36.9  | 5.46  | 1.25  | 14.8 | 125                   | 72   | 104.2 | 11.74 | 2.69  | 11.3 | 39                  | 22   | 31.2  | 4.57  | 1.05  | 14.6 |
| HCO <sub>3</sub> , mmol/L      | 37.5                | 29   | 31.6  | 1.92  | 0.44  | 6.1  | 33.9                  | 27.2 | 29.7  | 1.68  | 0.39  | 5.7  | 33.1                | 27.9 | 30.1  | 1.47  | 0.34  | 4.9  |
| BE <sub>ecf</sub> , mmol/L     | 11                  | 6    | 8.3   | 1.56  | 0.36  | 18.8 | 9                     | 5    | 6.9   | 1.31  | 0.3   | 19   | 8                   | 4    | 5.7   | 1.31  | 0.3   | 23   |
| Saturation of O <sub>2</sub> % | 87                  | 61   | 73.6  | 7.06  | 1.62  | 9.6  | 99                    | 96   | 98.5  | 0.83  | 0.19  | 0.8  | 74                  | 39   | 60.2  | 9.92  | 2.28  | 16.5 |

<sup>1</sup> TCO<sub>2</sub> = total carbon dioxide concentration; iCa<sup>2+</sup> = ionized calcium, HCT = hematocrit, HGB = hemoglobin, pH, pO<sub>2</sub> = oxygen pressure, pCO<sub>2</sub> = pressure of carbon dioxide, BE<sub>ecf</sub> = base excess in the extracellular fluid

**Table S4.** Correlation analysis between blood gas profile of jugular artery (-JA) and variables related with oxidative stress and permeability in milk (-M).

| Items <sup>1</sup>                     | SOD-M                     | pO <sub>2</sub> -JA       | K <sup>+</sup> -M         | Hct-JA                    | HGB-JA                    | oxygen<br>content-<br>JA  | T-<br>AOC-<br>M | Na <sup>+</sup> /K <sup>+</sup> -<br>M | SO <sub>2</sub> %-<br>JA | K <sup>+</sup> -JA | Plasmin-<br>M | MDA-<br>M | LDH-<br>M |
|----------------------------------------|---------------------------|---------------------------|---------------------------|---------------------------|---------------------------|---------------------------|-----------------|----------------------------------------|--------------------------|--------------------|---------------|-----------|-----------|
| SOD-M                                  | 1                         |                           |                           |                           |                           |                           |                 |                                        |                          |                    |               |           |           |
| pO <sub>2</sub> -JA                    | 0.27<br>(-0.19-<br>0.64)  | 1                         |                           |                           |                           |                           |                 |                                        |                          |                    |               |           |           |
| K <sup>+</sup> -M                      | 0.13<br>(-0.33-<br>0.54)  | 0.02<br>(-0.43-<br>0.45)  | 1                         |                           |                           |                           |                 |                                        |                          |                    |               |           |           |
| Hct-JA                                 | 0.03<br>(-0.42-<br>0.46)  | 0.03<br>(-0.42-<br>0.46)  | 0.2<br>(-0.26-<br>0.59)   | 1                         |                           |                           |                 |                                        |                          |                    |               |           |           |
| HGB-JA                                 | 0.01<br>(-0.43-<br>0.45)  | -0.07<br>(-0.50-<br>0.38) | 0.57<br>(0.17-<br>0.81)   | 0.72<br>(0.41-<br>0.88)   | 1                         |                           |                 |                                        |                          |                    |               |           |           |
| oxygen<br>content-<br>JA               | 0.01<br>(-0.43-<br>0.45)  | -0.02<br>(-0.45-<br>0.43) | 0.53<br>(0.11-<br>0.79)   | 0.74<br>(0.45-<br>0.89)   | 0.99<br>(0.98-1.00)       | 1                         |                 |                                        |                          |                    |               |           |           |
| T-AOC-<br>M                            | -0.35<br>(-0.68-<br>0.11) | -0.36<br>(-0.69-<br>0.10) | -0.07<br>(-0.50-<br>0.38) | -0.24<br>(-0.61-<br>0.23) | -0.02<br>(-0.46-<br>0.43) | -0.01<br>(-0.35-<br>0.53) | 1               |                                        |                          |                    |               |           |           |
| Na <sup>+</sup> /K <sup>+</sup> -<br>M | -0.07                     | -0.25                     | -0.66                     | 0.01                      | -0.35                     | -0.31                     | 0.26            | 1                                      |                          |                    |               |           |           |

|                          |                            |                           |                           |                           |                           |                           |                           |                           |                           |                          |                         |                         |   |
|--------------------------|----------------------------|---------------------------|---------------------------|---------------------------|---------------------------|---------------------------|---------------------------|---------------------------|---------------------------|--------------------------|-------------------------|-------------------------|---|
|                          | (-0.49-<br>0.39)           | (-0.62-<br>0.22)          | (-0.85--<br>0.31)         | (-0.43-<br>0.45)          | (-0.69-<br>0.11)          | (-0.66-<br>0.16)          | (-0.21-<br>0.63)          |                           |                           |                          |                         |                         |   |
| SO <sub>2</sub> %-<br>JA | -0.11<br>(-0.52-<br>0.35)  | 0.07<br>(-0.39-<br>0.49)  | -0.2<br>(-0.59-<br>0.27)  | 0.4<br>(-0.05-<br>0.72)   | 0.27<br>(-0.20-<br>0.63)  | 0.37<br>(-0.09-<br>0.70)  | 0.26<br>(-0.21-<br>0.63)  | 0.39<br>(-0.07-<br>0.71)  | 1                         |                          |                         |                         |   |
| K <sup>+</sup> -JA       | -0.36<br>(-0.69-<br>0.10)  | -0.12<br>(-0.54-<br>0.34) | -0.36<br>(-0.69-<br>0.10) | 0.06<br>(-0.39-<br>0.49)  | -0.16<br>(-0.56-<br>0.30) | -0.16<br>(-0.56-<br>0.30) | -0.07<br>(-0.49-<br>0.39) | 0.27<br>(-0.20-<br>0.64)  | 0.02<br>(-0.43-<br>0.46)  | 1                        |                         |                         |   |
| Plasmin<br>-M            | -0.78<br>(-0.91--<br>0.50) | -0.16<br>(-0.56-<br>0.31) | 0.1<br>(-0.36-<br>0.52)   | -0.17<br>(-0.57-<br>0.29) | -0.03<br>(-0.46-<br>0.42) | -0.05<br>(-0.48-<br>0.40) | 0.18<br>(-0.28-<br>0.58)  | -0.15<br>(-0.55-<br>0.32) | -0.18<br>(-0.58-<br>0.29) | 0.08<br>(-0.38-<br>0.50) | 1                       |                         |   |
| MDA-M                    | -0.92<br>(-0.97--<br>0.80) | -0.11<br>(-0.52-<br>0.35) | 0.04<br>(-0.41-<br>0.48)  | -0.1<br>(-0.52-<br>0.35)  | -0.03<br>(-0.46-<br>0.42) | -0.03<br>(-0.47-<br>0.42) | 0.19<br>(-0.28-<br>0.58)  | -0.1<br>(-0.52-<br>0.36)  | 0.01<br>(-0.43-<br>0.45)  | 0.32<br>(-0.15-<br>0.67) | 0.84<br>(0.64-<br>0.94) | 1                       |   |
| LDH-M                    | -0.9<br>(-0.96--<br>0.76)  | -0.02<br>(-0.45-<br>0.43) | 0.01<br>(-0.43-<br>0.45)  | 0<br>(-0.44-<br>0.45)     | 0.11<br>(-0.35-<br>0.53)  | 0.11<br>(-0.35-<br>0.53)  | 0.2<br>(-0.27-<br>0.59)   | -0.02<br>(-0.46-<br>0.42) | 0.07<br>(-0.38-<br>0.50)  | 0.29<br>(-0.18-<br>0.65) | 0.83<br>(0.62-<br>0.93) | 0.92<br>(0.80-<br>0.97) | 1 |

<sup>1</sup> SOD: Super oxide dismutase; pO<sub>2</sub>: oxygen pressure; Hct: red blood cell specific volume; HGB: hemoglobin; T-AOC: total antioxidant capacity; SO<sub>2</sub>: oxygen saturation; MDA: malonaldehyde; LDH: lactic dehydrogenase.

The bracket is 95% confidence intervals.

**Table S5.** Correlation analysis between blood gas profile of jugular vein (-JV) and variables related with oxidative stress and permeability in milk (-M).

| Items <sup>1</sup>                     | K <sup>+</sup> -M          | Hct-JV                    | HGB-JV                    | SOD-M                     | oxygen<br>content-<br>JV  | Na <sup>+</sup> /K <sup>+</sup> -<br>M | K <sup>+</sup> -JV | pO <sub>2</sub> -JV | SO <sub>2</sub> %-<br>JV | T-AOC-<br>M | Plasmin-<br>M | MDA-<br>M | LDH-<br>M |
|----------------------------------------|----------------------------|---------------------------|---------------------------|---------------------------|---------------------------|----------------------------------------|--------------------|---------------------|--------------------------|-------------|---------------|-----------|-----------|
| K <sup>+</sup> -M                      | 1                          |                           |                           |                           |                           |                                        |                    |                     |                          |             |               |           |           |
| Hct-JV                                 | 0.4<br>(-0.06-<br>0.71)    | 1                         |                           |                           |                           |                                        |                    |                     |                          |             |               |           |           |
| HGB-JV                                 | 0.39<br>(-0.06-<br>0.71)   | 0.99<br>(0.98-<br>1.00)   | 1                         |                           |                           |                                        |                    |                     |                          |             |               |           |           |
| SOD-M                                  | 0.13<br>(-0.33-<br>0.54)   | 0.1<br>(-0.35-<br>0.52)   | 0.09<br>(-0.37-<br>0.51)  | 1                         |                           |                                        |                    |                     |                          |             |               |           |           |
| oxygen<br>content-<br>JV               | 0.17<br>(-0.30-<br>0.57)   | 0.32<br>(-0.14-<br>0.67)  | 0.37<br>(-0.09-<br>0.70)  | 0.29<br>(-0.18-<br>0.65)  | 1                         |                                        |                    |                     |                          |             |               |           |           |
| Na <sup>+</sup> /K <sup>+</sup> -<br>M | -0.66<br>(-0.85--<br>0.31) | -0.4<br>(-0.71-<br>0.05)  | -0.41<br>(-0.72-<br>0.05) | -0.07<br>(-0.49-<br>0.39) | -0.02<br>(-0.46-<br>0.43) | 1                                      |                    |                     |                          |             |               |           |           |
| K <sup>+</sup> -JV                     | -0.47<br>(-0.76--<br>0.04) | -0.23<br>(-0.61-<br>0.23) | -0.22<br>(-0.60-<br>0.25) | -0.39<br>(-0.71-<br>0.06) | -0.27<br>(-0.63-<br>0.20) | 0.37<br>(-0.09-<br>0.70)               | 1                  |                     |                          |             |               |           |           |
| pO <sub>2</sub> -JV                    | -0.02                      | -0.14                     | -0.16                     | 0.19                      | -0.03                     | 0.02                                   | -0.09              | 1                   |                          |             |               |           |           |

|                      |                       |                       |                       |                        |                       |                       |                       |                       |                       |                      |                     |                     |   |
|----------------------|-----------------------|-----------------------|-----------------------|------------------------|-----------------------|-----------------------|-----------------------|-----------------------|-----------------------|----------------------|---------------------|---------------------|---|
|                      | (-0.46-0.42)          | (-0.55-0.32)          | (-0.56-0.30)          | (-0.27-0.59)           | (-0.47-0.42)          | (-0.43-0.46)          | (-0.51-0.37)          |                       |                       |                      |                     |                     |   |
| SO <sub>2</sub> %-JV | -0.02<br>(-0.46-0.43) | -0.19<br>(-0.58-0.28) | -0.21<br>(-0.60-0.25) | 0.14<br>(-0.32-0.55)   | -0.06<br>(-0.49-0.39) | 0<br>(-0.44-0.44)     | -0.11<br>(-0.53-0.35) | 0.98<br>(0.95-0.99)   | 1                     |                      |                     |                     |   |
| T-AOC-M              | -0.07<br>(-0.50-0.38) | -0.16<br>(-0.56-0.30) | -0.17<br>(-0.57-0.30) | -0.35<br>(-0.68-0.11)  | 0.11<br>(-0.35-0.53)  | 0.26<br>(-0.21-0.63)  | 0.06<br>(-0.39-0.49)  | 0.18<br>(-0.29-0.57)  | 0.18<br>(-0.29-0.57)  | 1                    |                     |                     |   |
| Plasmin-M            | 0.1<br>(-0.36-0.52)   | -0.07<br>(-0.49-0.39) | -0.07<br>(-0.50-0.38) | -0.78<br>(-0.91--0.51) | -0.31<br>(-0.66-0.15) | -0.15<br>(-0.55-0.32) | 0.4<br>(-0.05-0.72)   | -0.06<br>(-0.49-0.40) | -0.04<br>(-0.48-0.41) | 0.18<br>(-0.28-0.58) | 1                   |                     |   |
| MDA-M                | 0.04<br>(-0.41-0.48)  | -0.1<br>(-0.52-0.36)  | -0.09<br>(-0.51-0.37) | -0.92<br>(-0.97--0.80) | -0.32<br>(-0.67-0.15) | -0.1<br>(-0.52-0.36)  | 0.34<br>(-0.12-0.68)  | 0.01<br>(-0.44-0.45)  | 0.05<br>(-0.40-0.49)  | 0.19<br>(-0.28-0.58) | 0.84<br>(0.64-0.94) | 1                   |   |
| LDH-M                | 0.01<br>(-0.43-0.45)  | 0.02<br>(-0.43-0.46)  | 0.01<br>(-0.43-0.45)  | -0.9<br>(-0.96--0.76)  | -0.35<br>(-0.69-0.11) | -0.02<br>(-0.46-0.42) | 0.38<br>(-0.08-0.70)  | -0.06<br>(-0.49-0.39) | -0.02<br>(-0.46-0.43) | 0.2<br>(-0.27-0.59)  | 0.83<br>(0.62-0.93) | 0.92<br>(0.80-0.97) | 1 |

<sup>1</sup> SOD: Super oxide dismutase; pO<sub>2</sub>: oxygen pressure; Hct: red blood cell specific volume; HGB: hemoglobin; T-AOC: total antioxidant capacity; SO<sub>2</sub>: oxygen saturation; MDA: malonaldehyde; LDH: lactic dehydrogenase.

The bracket is 95% confidence intervals.

**Table S6.** Correlation analysis between blood gas profile of mammary vein (-MV) and variables related with oxidative stress and permeability in milk (-M).

| Items <sup>1</sup>                 | pO <sub>2</sub> -MV   | SO <sub>2</sub> %-MV  | SOD-M                | oxygen content-MV   | K <sup>+</sup> -M   | Hct-MV | HGB-MV | Na <sup>+</sup> /K <sup>+</sup> -M | K <sup>+</sup> -MV | T-AOC-M | Plasmin-M | MDA-M | LDH-M |
|------------------------------------|-----------------------|-----------------------|----------------------|---------------------|---------------------|--------|--------|------------------------------------|--------------------|---------|-----------|-------|-------|
| pO <sub>2</sub> -MV                | 1                     |                       |                      |                     |                     |        |        |                                    |                    |         |           |       |       |
| SO <sub>2</sub> %-MV               | 0.96<br>(0.89-0.98)   | 1                     |                      |                     |                     |        |        |                                    |                    |         |           |       |       |
| SOD-M                              | 0.83<br>(0.61-0.93)   | 0.83<br>(0.61-0.93)   | 1                    |                     |                     |        |        |                                    |                    |         |           |       |       |
| oxygen content-MV                  | 0.78<br>(0.52-0.91)   | 0.78<br>(0.52-0.91)   | 0.9<br>(0.75-0.96)   | 1                   |                     |        |        |                                    |                    |         |           |       |       |
| K <sup>+</sup> -M                  | 0.03<br>(-0.42-0.47)  | 0<br>(-0.44-0.44)     | 0.13<br>(-0.33-0.54) | 0.3<br>(-0.16-0.66) | 1                   |        |        |                                    |                    |         |           |       |       |
| Hct-MV                             | 0<br>(-0.44-0.45)     | -0.07<br>(-0.50-0.39) | 0.35<br>(-0.11-0.68) | 0.56<br>(0.15-0.80) | 0.5<br>(0.08-0.77)  | 1      |        |                                    |                    |         |           |       |       |
| HGB-MV                             | -0.01<br>(-0.45-0.43) | -0.07<br>(-0.50-0.38) | 0.34<br>(-0.12-0.68) | 0.55<br>(0.15-0.80) | 0.47<br>(0.04-0.76) | 1      | 1      |                                    |                    |         |           |       |       |
| Na <sup>+</sup> /K <sup>+</sup> -M | -0.13                 | -0.09                 | -0.07                | -0.25               | -0.66               | -0.32  | -0.27  | 1                                  |                    |         |           |       |       |



|                    |                            |                            |                            |                            |                            |                           |                           |                           |                           |                          |                         |                         |   |
|--------------------|----------------------------|----------------------------|----------------------------|----------------------------|----------------------------|---------------------------|---------------------------|---------------------------|---------------------------|--------------------------|-------------------------|-------------------------|---|
|                    | (-0.54-<br>0.33)           | (-0.51-<br>0.37)           | (-0.49-<br>0.38)           | (-0.63-<br>0.21)           | (-0.85--<br>0.31)          | (-0.67-<br>0.15)          | (-0.63-<br>0.20)          |                           |                           |                          |                         |                         |   |
| K <sup>+</sup> -MV | -0.47<br>(-0.76--<br>0.04) | -0.52<br>(-0.78--<br>0.10) | -0.42<br>(-0.73-<br>0.03)  | -0.55<br>(-0.80--<br>0.14) | -0.53<br>(-0.79--<br>0.11) | -0.15<br>(-0.55-<br>0.32) | -0.13<br>(-0.54-<br>0.33) | 0.32<br>(-0.15-<br>0.66)  | 1                         |                          |                         |                         |   |
| T-AOC-M            | -0.42<br>(-0.73-<br>0.03)  | -0.35<br>(-0.68-<br>0.11)  | -0.35<br>(-0.68-<br>0.11)  | -0.37<br>(-0.70-<br>0.08)  | -0.07<br>(-0.50-<br>0.38)  | -0.15<br>(-0.56-<br>0.31) | -0.13<br>(-0.54-<br>0.33) | 0.26<br>(-0.21-<br>0.63)  | -0.01<br>(-0.45-<br>0.44) | 1                        |                         |                         |   |
| Plasmin-M          | -0.62<br>(-0.83--<br>0.24) | -0.61<br>(-0.83--<br>0.23) | -0.78<br>(-0.91--<br>0.51) | -0.7<br>(-0.87--<br>0.37)  | 0.1<br>(-0.36-<br>0.52)    | -0.32<br>(-0.67-<br>0.14) | -0.32<br>(-0.67-<br>0.15) | -0.15<br>(-0.55-<br>0.32) | 0.11<br>(-0.35-<br>0.53)  | 0.18<br>(-0.28-<br>0.58) | 1                       |                         |   |
| MDA-M              | -0.74<br>(-0.89--<br>0.44) | -0.78<br>(-0.91--<br>0.51) | -0.92<br>(-0.97--<br>0.80) | -0.85<br>(-0.94--<br>0.65) | 0.04<br>(-0.41-<br>0.48)   | -0.33<br>(-0.67-<br>0.14) | -0.33<br>(-0.67-<br>0.14) | -0.1<br>(-0.52-<br>0.36)  | 0.37<br>(-0.09-<br>0.70)  | 0.19<br>(-0.28-<br>0.58) | 0.84<br>(0.64-<br>0.94) | 1                       |   |
| LDH-M              | -0.78<br>(-0.91--<br>0.52) | -0.78<br>(-0.91--<br>0.51) | -0.9<br>(-0.96--<br>0.76)  | -0.78<br>(-0.91--<br>0.51) | 0.01<br>(-0.43-<br>0.45)   | -0.21<br>(-0.60-<br>0.25) | -0.2<br>(-0.59-<br>0.27)  | -0.02<br>(-0.46-<br>0.42) | 0.35<br>(-0.11-<br>0.69)  | 0.2<br>(-0.27-<br>0.59)  | 0.83<br>(0.62-<br>0.93) | 0.92<br>(0.80-<br>0.97) | 1 |

<sup>1</sup> SOD: Super oxide dismutase; pO<sub>2</sub>: oxygen pressure; Hct: red blood cell specific volume; HGB: hemoglobin; T-AOC: total antioxidant capacity; SO<sub>2</sub>: oxygen saturation; MDA: malonaldehyde; LDH: lactic dehydrogenase.

The bracket is 95% confidence intervals.
